# Indoor Air Pollution, Nighttime Heart Rate Variability and Coffee Consumption among Convenient Store Workers

Kai-Jen Chuang<sup>1,2\*</sup>, Hsiao-Chi Chuang<sup>3,4</sup>, Lian-Yu Lin<sup>5</sup>

**1** Department of Public Health, School of Medicine, College of Medicine, Taipei Medical University, Taipei, Taiwan, **2** School of Public Health, College of Public Health and Nutrition, Taipei Medical University, Taipei, Taiwan, **3** Division of Pulmonary Medicine, Department of Internal Medicine, Shuang Ho Hospital, Taipei Medical University, Taipei, Taiwan, **4** School of Respiratory Therapy, College of Medicine, Taipei Medical University, Taipei, Taiwan, **5** Department of Internal Medicine, Division of Cardiology, National Taiwan University Hospital, Taipei, Taiwan

## Abstract

**Background:** The association between ambient air pollution and heart rate variability (HRV) has been well-documented. Little is known about the association of HRV at night with indoor air pollution and coffee consumption. The aim of this study was to investigate the association of HRV indices with indoor air pollution, working time and coffee consumption.

**Methods:** We recruited 60 young healthy convenient store workers to monitor indoor PM<sub>2.5</sub> (particulate matter with an aerodynamic diameter  $\leq 2.5 \mu\text{m}$ ) exposures, coffee consumption (yes vs. no) and HRV indices during daytime (0700–1500 hours) and nighttime (2300–0700 hours). We used linear mixed effects models to assess the associations of HRV indices with indoor PM<sub>2.5</sub> exposures and coffee consumption.

**Results:** We observed the inverse association between indoor PM<sub>2.5</sub> exposures and HRV indices, with a decrease in all HRV indices with increased indoor PM<sub>2.5</sub> exposures. However, the decrease was most pronounced during nighttime, where a 1 interquartile range (IQR) increase in indoor PM<sub>2.5</sub> at 4-hr time-weighted moving average was associated with a change of  $-4.78\%$  5-min standard deviation (SD) of normal-to-normal intervals for 5-min segment (SDNN) and  $-3.23\%$  5-min square root of the mean squared differences of successive intervals for 5-min segment (r-MSSD). Effects of indoor PM<sub>2.5</sub> were lowest for participants with coffee consumption during daytime.

**Conclusions:** Indoor PM<sub>2.5</sub> exposures were associated with decreased 5-min SDNN and 5-min r-MSSD, especially during nighttime. The effect of indoor PM<sub>2.5</sub> on HRV indices may be modified by coffee consumption in young healthy convenient store workers.

**Citation:** Chuang K-J, Chuang H-C, Lin L-Y (2013) Indoor Air Pollution, Nighttime Heart Rate Variability and Coffee Consumption among Convenient Store Workers. PLoS ONE 8(8): e63320. doi:10.1371/journal.pone.0063320

**Editor:** Bruno Caramelli, University of Sao Paulo, Brazil

**Received:** December 31, 2012; **Accepted:** March 29, 2013; **Published:** August 15, 2013

**Copyright:** © 2013 Chuang et al. This is an open-access article distributed under the terms of the Creative Commons Attribution License, which permits unrestricted use, distribution, and reproduction in any medium, provided the original author and source are credited.

**Funding:** This study was supported by grants (101-2314-B-038-053-MY3) from the National Science Council of Taiwan. The funders had no role in study design, data collection and analysis, decision to publish, or preparation of the manuscript.

**Competing Interests:** The authors have declared that no competing interests exist.

\* E-mail: kjc@tmu.edu.tw

## Introduction

The association between indoor ambient air pollution and cardiovascular effects has been reported in previous studies [1,2]. The plausible pathophysiologic mechanisms of pollution-induced cardiovascular effects involve cardiac autonomic dysfunction [3] represented by using heart rate variability (HRV). Decrease in HRV has been linked to increased risk of hypertension [4], the rapid progression of atherosclerosis [5] and cardiovascular mortality [6]. Several studies have described the association of decreased HRV with ambient air pollution [7–9] by using various methods because of uncertainty in time course of HRV responses to ambient air pollution exposure. The majority of studies have examined changes in short-term HRV with ambient air pollution exposure averaged over hours or days [10]. However, no study has investigated the association between occupational exposure to

indoor air pollutants and HRV among young healthy workers in nighttime.

Caffeine is the most widely consumed substance in coffee, tea and cocoa around the world [11]. The main effects of caffeine include increased respiratory rate, diuresis and psychoactive effects on autonomic function [12]. It has been shown that caffeine may be associated with arrhythmia [13] and hypertension [14]. A recent study further reported the association between coffee consumption and HRV alteration in young, healthy people [15]. Although the above mentioned studies indicated the effects on HRV exerted by caffeine in a beverage, little is known about the interaction between coffee consumption, indoor air pollutants exposures and HRV alteration. The aim of this study was to investigate the association of HRV with occupational exposure to indoor air pollutants and coffee consumption among young healthy convenient store workers. We further investigated whether coffee consumption modified effects of indoor air pollutants and

whether workers were vulnerable to indoor air pollutants effects in nighttime.

## Materials and Methods

### Ethics Approval

This study was approved by the ethics committee of St. Mary's Medicine Nursing and Management College. An written informed consent was obtained from each participant before the study.

### Participants and Study Design

The study participants consisted of 60 young, healthy, non-smoking students aged 19 to 30 working in various convenient stores in the Taipei metropolitan area. The selection criteria of study participants were as follows: students aged between 18 and 30; no history of smoking; no medication that might affect cardiac rhythm; and no cardiovascular diseases, such as coronary artery disease, arrhythmia, hypertension, diabetes mellitus, and dyslipidemia. The statuses of work shift and coffee consumption were also used to divide recruited participants into different groups. Half of the participants worked in daytime (0700–1500 hours), whereas the other 30 participants worked in nighttime (2300–0700 hours). The protocol included three visits that entailed continuous 8-hour resting electrocardiographic (ECG), indoor air pollution, noise and meteorological conditions monitoring at approximately

1-week intervals in the years 2009 to 2012. Each of the 60 participants had 3 visits, making a total of 180 visits. During their first visits, age, sex, body mass index (BMI), environmental characteristics were recorded by a questionnaire. Information on coffee consumption, diet and time-activity patterns during the study were collected in all visits.

### Indoor Air Pollution, Noise and Meteorological Data

We conducted 8-hour continuous indoor air pollution, noise and meteorological conditions monitoring each visit for each participant. Indoor PM less than 2.5  $\mu\text{m}$  in diameter ( $\text{PM}_{2.5}$ ), temperature and relative humidity were measured continuously using a personal dust monitor (DUST-check portable dust monitor, model 1.108; Grimm Labortechnik Ltd., Ainring, Germany), which measured and recorded 1-minute mass concentrations of  $\text{PM}_{2.5}$  as well as temperature and relative humidity. Total volatile organic compounds (VOCs) were measured continuously using a total VOC monitor (ppbRAE Plus, model PGM-7240; RAE Systems, Inc., San Jose, CA, USA). Carbon dioxide ( $\text{CO}_2$ ) and carbon monoxide (CO) concentrations were determined with an electrochemical sensor (Q-Trak monitor, model 8554, TSI, Inc., Shoreview, MN, USA). Noise level was measured by using a portable noise dosimeter (Logging Noise Dose Meter Type 4443, Brüel & Kjær, Nærum, Denmark.), which reports 1-min continuous equivalent sound levels (Leq) and the time-weighted-averages (TWA) of noise doses. The range of 30–100 dBA was used to measure noise exposure with 1-min readings over 8 hours. After sampling, the raw data for 1-min indoor  $\text{PM}_{2.5}$ , total VOCs,  $\text{CO}_2$ , CO, temperature, relative humidity and noise measurements were matched with the sampling time of HRV monitoring and then computed to 1- to 4-hr time-weighted moving averages if 75% of the data were present.

### HRV Monitoring

We performed continuous ambulatory electrocardiographic (ECG) monitoring using a PacerCorder 3-channel device (model 461A; Del Mar Medical Systems LLC, Irvine, CA, USA) with a sampling rate of 250 Hz (4 msec). ECG tapes were analyzed using a Delmar Avionics model Strata Scan 563 (Irvine, CA). A complete 5-minute segment of NN interval was taken for HRV analysis, including standard deviation of normal-to-normal (NN) intervals (SDNN) and the square root of the mean of the sum of the squares of differences between adjacent NN intervals (r-MSSD).

### Statistical Analysis

The mixed-effects regression models were applied to examine the association of indoor air pollutants with  $\log_{10}$ -transformed HRV indices by running R statistical software version 2.15.1. The independent variables were indoor  $\text{PM}_{2.5}$ , total VOCs,  $\text{CO}_2$  and CO at 1- to 4-hr time-weighted moving averages, whereas the dependent variables were SDNN and r-MSSD. We treated participant's sex, age, BMI, order of the visit, hour of day, temperature, relative humidity, noise and indoor air pollutants as fixed effects and fitted participant identity number as a random intercept term in our mixed-effects models. Effect modification by coffee consumption (yes versus no) and working time (daytime versus nighttime) were assessed in separate linear mixed effects models by including interaction terms between indoor air pollution effects and each potential effect modifier. Pollution effects are expressed as percent changes by interquartile range (IQR) changes as  $[10(\beta \times \text{IQR}) - 1] \times 100\%$  for  $\log_{10}$ -transformed HRV indices, where  $\beta$  is the estimated regression coefficient.

**Table 1.** Basic characteristics of 60 study participants (mean  $\pm$  standard deviation).

| Characteristics                     | Daytime participants | Nighttime participants | P value <sup>a</sup> |
|-------------------------------------|----------------------|------------------------|----------------------|
| Sex, n                              |                      |                        | –                    |
| Female                              | 15                   | 15                     |                      |
| Male                                | 15                   | 15                     |                      |
| Age, y                              |                      |                        | –                    |
| Mean                                | 22.1 $\pm$ 1.1       | 23.4 $\pm$ 1.4         |                      |
| Range                               | 19–30                | 21–30                  |                      |
| Body mass index, kg/m <sup>2</sup>  |                      |                        | –                    |
| Mean                                | 21.5 $\pm$ 1.8       | 22.5 $\pm$ 2.2         |                      |
| Range                               | 18.5–26.4            | 20.6–28.2              |                      |
| $\log_{10}$ SDNN, ms <sup>2</sup>   |                      |                        | 0.02                 |
| Mean                                | 1.68 $\pm$ 0.21      | 1.87 $\pm$ 0.42        |                      |
| Range                               | 0.85–1.95            | 0.97–2.10              |                      |
| No.                                 | 8640                 | 8640                   |                      |
| $\log_{10}$ r-MSSD, ms <sup>2</sup> |                      |                        | 0.02                 |
| Mean                                | 1.21 $\pm$ 0.24      | 1.54 $\pm$ 0.33        |                      |
| Range                               | 0.52–1.72            | 0.64 $\pm$ 1.87        |                      |
| No.                                 | 8640                 | 8640                   |                      |
| Coffee consumption, n               |                      |                        | –                    |
| No                                  | 15                   | 15                     |                      |
| Female                              | 7                    | 7                      |                      |
| Male                                | 8                    | 8                      |                      |
| Yes                                 | 15                   | 15                     |                      |
| Female                              | 8                    | 8                      |                      |
| Male                                | 7                    | 7                      |                      |

<sup>a</sup>Difference between daytime and nighttime participants was tested by t-test. doi:10.1371/journal.pone.0063320.t001

**Table 2.** Summary statistics for indoor air pollution levels, noise and meteorological variables (mean  $\pm$  standard deviation).

|                                                         | Daytime participants | Nighttime participants | P value <sup>a</sup> |
|---------------------------------------------------------|----------------------|------------------------|----------------------|
| <b>Indoor air pollutants and noise</b>                  |                      |                        |                      |
| PM <sub>2.5</sub> 1-hour mean, $\mu\text{g}/\text{m}^3$ | 26.5 $\pm$ 9.5       | 22.1 $\pm$ 4.3         | <0.01                |
| Interquartile Range                                     | 18.6                 | 15.6                   |                      |
| Range                                                   | 17.5–52.0            | 16.4–39.1              |                      |
| No.                                                     | 8640                 | 8640                   |                      |
| Total VOCs 1-hour mean, ppb                             | 47.5 $\pm$ 22.4      | 41.1 $\pm$ 15.6        | <0.01                |
| Interquartile Range                                     | 26.4                 | 23.9                   |                      |
| Range                                                   | 10–115.5             | 10–82.3                |                      |
| No.                                                     | 8640                 | 8640                   |                      |
| CO <sub>2</sub> 1-hour mean, ppm                        | 125 $\pm$ 59         | 125 $\pm$ 60           | 0.46                 |
| Interquartile Range                                     | 80.6                 | 79.8                   |                      |
| Range                                                   | 25–450               | 21–421                 |                      |
| No.                                                     | 8640                 | 8640                   |                      |
| CO 1-hour mean, ppm                                     | 0.9 $\pm$ 0.3        | 0.8 $\pm$ 0.4          | 0.45                 |
| Interquartile Range                                     | 0.5                  | 0.5                    |                      |
| Range                                                   | 0.4–1.9              | 0.4–1.4                |                      |
| No.                                                     | 8640                 | 8640                   |                      |
| Noise 1-hour mean, dBA                                  | 52.0 $\pm$ 10.1      | 42.5 $\pm$ 6.4         | <0.01                |
| Range                                                   | 30.0–98              | 30.0–92                |                      |
| No.                                                     | 8640                 | 8640                   |                      |
| <b>Meteorological variables</b>                         |                      |                        |                      |
| Temperature, $^{\circ}\text{C}$                         | 25.2 $\pm$ 3.0       | 24.6 $\pm$ 2.8         | 0.23                 |
| Range                                                   | 19.8–30.5            | 18.9–29.3              |                      |
| No.                                                     | 8640                 | 8640                   |                      |
| Relative humidity, %                                    | 56.4 $\pm$ 8.2       | 55.7 $\pm$ 7.8         | 0.34                 |
| Range                                                   | 29.4–75.1            | 40.1–82.3              |                      |
| No.                                                     | 8640                 | 8640                   |                      |

<sup>a</sup>Difference between daytime and nighttime participants was tested by t-test.  
doi:10.1371/journal.pone.0063320.t002

## Results

Sixty young convenient store workers were recruited for this study, and 180 workplace visits with 8640 hourly environmental and physiological measurements were included in data analyses. As shown in Table 1, the ages of 60 study participants were 19–30 years among 30 daytime participants and 21–30 years among 30 nighttime participants. Their mean BMIs were 21.5  $\text{kg}/\text{m}^2$  and 22.5  $\text{kg}/\text{m}^2$ , respectively. Half of them consumed coffee during the study. The amounts of coffee consumed by these participants were 12–16 oz/visit. No participant consumed tea, cocoa or chocolate. The male/female ratios were 1:1 in both groups. The nighttime group had significantly higher values of HRV indices than the daytime group. All participants' indoor air pollutants exposures, noise and meteorological conditions during the study period were summarized in Table 2. The daytime participants had significantly higher indoor PM<sub>2.5</sub>, Total VOCs and noise exposures than the nighttime participants. No significant difference between daytime and nighttime study periods for CO and CO<sub>2</sub> exposures. The workplace weather conditions were pleasant with a temperature range of 24.6 to 25.2 $^{\circ}\text{C}$  and a relative humidity range of 55.7 to 56.4% during the study period.

Table 3 lists the associations between indoor air pollutants and HRV indices among daytime and nighttime participants. With

sex, age, BMI, order of the visit, hour of day, temperature, relative humidity and noise being adjusted in our mixed-effects models, indoor PM<sub>2.5</sub> and total VOCs exposures significantly decreased SDNN and r-MSSD for both the daytime participants and the nighttime participants. By contrast, CO exposures were not associated with SDNN or r-MSSD in our study subjects. The greatest decreases in SDNN and r-MSSD occurred with indoor PM<sub>2.5</sub> and total VOCs exposures at 4-hr time-weighted moving averages (IQR = 14.2  $\mu\text{g}/\text{m}^3$  and 22.8 ppb) in the nighttime participants. We examined the time course of indoor air pollutants exposures only up to 4-hr time-weighted moving averages because available data became substantially decreased for calculating time-weighted moving averages greater than 4 hr.

In mixed-effects models in which 4-hr time-weighted moving averages pollutants predicted HRV indices, we found the effect of indoor PM<sub>2.5</sub> and total VOCs to be modified by coffee consumption and working time (Table 4). Participants with coffee consumption showed no significant change in HRV indices, whereas participants without coffee consumption showed significant changes in SDNN and r-MSSD associated with indoor air pollutants at 4-hr time-weighted moving averages (P value for interaction <0.05). We also found stronger effects of indoor PM<sub>2.5</sub> on HRV indices among participants working at nighttime than at daytime (P value for interaction <0.05).

**Table 3.** Percentage changes (95% confidence interval)<sup>a</sup> in heart rate variability for interquartile increase in indoor pollutants exposures estimated by mixed effects models.

|               | Exposure matrix | Daytime participants |                |               | Nighttime participants |                |               |
|---------------|-----------------|----------------------|----------------|---------------|------------------------|----------------|---------------|
|               |                 | PM <sub>2.5</sub>    | Total VOCs     | CO            | PM <sub>2.5</sub>      | Total VOCs     | CO            |
| SDNN          | 1-hour moving   | -0.62*               | -1.26          | 1.50          | -1.65*                 | -1.39          | -1.21         |
|               |                 | (-1.01, -0.23)       | (-3.46, 0.94)  | (-3.55, 6.55) | (-2.70, -0.60)         | (-3.39, 0.61)  | (-3.00, 0.58) |
|               | 2-hour moving   | -1.17*               | -0.40          | -0.02         | -2.50*                 | -2.00          | 1.05          |
|               |                 | (-2.13, -0.21)       | (-1.13, 0.33)  | (-1.23, 1.19) | (-3.55, -1.45)         | (-4.19, 0.19)  | (-2.04, 4.14) |
| 3-hour moving |                 | -2.75*               | -1.50*         | -0.88         | -3.75*                 | -1.88*         | 0.09          |
|               |                 | (-3.00, -2.50)       | (-2.11, -0.89) | (-5.69, 3.93) | (-4.22, -3.28)         | (-3.17, -0.59) | (-1.52, 1.70) |
| 4-hour moving |                 | -3.05*               | -2.50*         | -1.00         | -4.78*                 | -2.86*         | -1.70         |
|               |                 | (-5.40, -0.70)       | (-4.45, -0.55) | (-2.19, 0.19) | (-6.13, -3.43)         | (-3.81, -1.91) | (-3.77, 0.37) |
| r-MSSD        | 1-hour moving   | 1.02                 | 1.22           | 0.20          | -1.33*                 | -0.12          | -0.11         |
|               |                 | (-3.11, 5.15)        | (-4.50, 6.94)  | (-2.47, 2.87) | (-2.00, -0.66)         | (-2.12, 1.88)  | (-1.08, 0.86) |
|               | 2-hour moving   | -1.20*               | -0.68          | 1.02          | -1.98*                 | -1.35          | -1.07         |
|               |                 | (-2.15, -0.25)       | (-9.03, 7.67)  | (-2.23, 4.27) | (-2.92, -1.04)         | (-3.25, 0.55)  | (-4.44, 2.30) |
| 3-hour moving |                 | -1.45*               | -1.11*         | 1.80          | -2.25*                 | -2.10*         | -0.36         |
|               |                 | (-2.01, -0.89)       | (-2.75, -0.53) | (-4.89, 8.49) | (-4.12, -0.38)         | (-3.10, -1.10) | (-2.65, 1.93) |
| 4-hour moving |                 | -2.00*               | -2.09*         | -0.02         | -3.23*                 | -3.17*         | 1.55          |
|               |                 | (-3.00, -1.01)       | (-3.17, -1.01) | (-2.00, 1.96) | (-4.88, -1.58)         | (-4.65, -1.69) | (-0.55, 3.55) |

<sup>a</sup>Coefficients are expressed as % changes for interquartile changes in indoor air pollutants exposures in models adjusting for sex, age, BMI, order of the visit, hour of day, temperature, relative humidity and noise. \* p<0.01.

doi:10.1371/journal.pone.0063320.t003

We further investigated the associations between indoor air pollutants and HRV indices among daytime and nighttime participants with or without coffee consumption (Table 5). With sex, age, BMI, order of the visit, hour of day, temperature, relative humidity and noise being adjusted in our models, indoor PM<sub>2.5</sub> and total VOCs exposures significantly decreased SDNN and r-MSSD for both the daytime and the nighttime participants without coffee consumption. By contrast, pollution effects were lowest for the daytime participants with coffee consumption.

## Discussion

We found statistically significant association between indoor air pollutants exposures and decreased SDNN and r-MSSD among convenient store workers. When the working time was separated into the daytime (0700–1500 hours) and nighttime (2300–0700 hours) periods, the most pronounced decreases in HRV indices were seen at nighttime. Furthermore, we observed statistically significant effects of indoor air pollutants on HRV decreases among participants without coffee consumption compared with those among participants with coffee consumption. Few studies have investigated the association between air pollution exposures

**Table 4.** The effect modification (95% confidence interval)<sup>a</sup> of association of indoor air pollutants at 4-hr time-weighted moving averages with heart rate variability by coffee consumption and working time.

|                         | SDNN                  |                       | r-MSSD                |                       |
|-------------------------|-----------------------|-----------------------|-----------------------|-----------------------|
|                         | PM <sub>2.5</sub>     | Total VOCs            | PM <sub>2.5</sub>     | Total VOCs            |
| Coffee consumption      |                       |                       |                       |                       |
| Yes                     | 1.21 (-2.13, 4.55)    | -0.01 (-1.89, 1.87)   | -0.11 (-1.96, 1.74)   | 2.02 (-1.19, 5.23)    |
| No                      | -3.21 (-4.02, -2.40)* | -4.25 (-5.09, -3.41)* | -2.99 (-3.20, -2.78)* | -3.15 (-4.44, -1.86)* |
| P value for interaction | 0.041                 | 0.025                 | 0.021                 | <0.001                |
| Working time            |                       |                       |                       |                       |
| Daytime                 | -1.19 (-2.12, -0.26)* | -2.12 (-3.25, -0.99)* | -0.89 (-1.62, -0.16)* | -1.56 (-2.25, -0.87)* |
| Nighttime               | -3.54 (-4.31, -2.77)* | -2.96 (-3.56, -2.36)* | -2.87 (-4.02, -1.72)* | -2.06 (-3.16, -0.96)* |
| P value for interaction | 0.036                 | 0.26                  | 0.045                 | 0.19                  |

<sup>a</sup>Coefficients are expressed as % changes for interquartile changes in indoor air pollutants exposures in models adjusting for sex, age, BMI, order of the visit, hour of day, temperature, relative humidity and noise.

\*p<0.01.

doi:10.1371/journal.pone.0063320.t004

**Table 5.** Percentage changes (95% confidence interval)<sup>a</sup> in heart rate variability for interquartile increase in indoor pollutants at 4-hr time-weighted moving averages among participants with or without coffee consumption during the study.

|           | Participants with coffee consumption |                | Participants without coffee consumption |                |
|-----------|--------------------------------------|----------------|-----------------------------------------|----------------|
|           | PM <sub>2.5</sub>                    | Total VOCs     | PM <sub>2.5</sub>                       | Total VOCs     |
| Daytime   |                                      |                |                                         |                |
| SDNN      | -1.01*                               | -1.48          | -3.15*                                  | -2.28*         |
|           | (-1.80, -0.21)                       | (-5.41, 2.45)  | (-5.01, -1.29)                          | (-4.00, -0.56) |
| r-MSSD    | -0.89                                | -1.01          | -2.97*                                  | -2.06*         |
|           | (-2.01, 0.23)                        | (-3.76, 1.74)  | (-3.88, -2.06)                          | (-3.65, -0.47) |
| Nighttime |                                      |                |                                         |                |
| SDNN      | -1.99*                               | 0.89           | -5.67*                                  | -3.99*         |
|           | (-2.74, -1.24)                       | (-1.00, 2.78)  | (-8.16, -3.18)                          | (-5.54, -2.44) |
| r-MSSD    | -1.77*                               | -1.43*         | -4.69*                                  | -4.91*         |
|           | (-3.01, -0.53)                       | (-2.11, -0.75) | (-6.40, -2.98)                          | (-5.13, -4.69) |

<sup>a</sup>Coefficients are expressed as % changes for interquartile changes in indoor air pollutants exposures in models adjusting for sex, age, BMI, order of the visit, hour of day, temperature, relative humidity and noise.

\*p<0.01.

doi:10.1371/journal.pone.0063320.t005

and HRV indices [16,17] in nighttime, the majority have examined effects of ambient air pollution on autonomic function [7–9,18] to date. Our study is the first to demonstrate decreases in HRV indices over daytime and nighttime subsequent to occupational exposure to indoor air pollution among convenient store workers with/without coffee consumption.

Although direct comparison between our study findings and previous studies is not feasible due to the differences of study subject and environmental exposure characterization, the direction of associations in our study is consistent with the inverse exposure-response association found in previous studies of particulate air pollution on HRV indices in nighttime. In a panel of 36 male boilermaker welders, elevated PM<sub>2.5</sub> levels were associated with decreased 5-min SDNN and 5-min r-MSSD in night periods (2400–0700 hours) [17]. A similar association was observed with 10-min SDNN in a panel of 10 nonsmoking, male highway patrol troopers while working a 3 p.m. to midnight shift [16]. Moreover, an inverse association between 6-hr SDNN in nighttime (2400–0600 hours) and same-day PM<sub>10</sub> (particulate matter with an aerodynamic diameter ≤ 10 μm) exposure was observed among seven cardiac patients [19]. Such findings are consistent with the decreases in 5-min SDNN and 5-min r-MSSD that we observed in nighttime convenient store workers following occupational exposure to indoor PM<sub>2.5</sub> exposure. It should be noted that sleep is an important modulator of HRV specific to the stages of sleep [20]. The observed associations between nighttime HRV indices and PM exposures in previous studies [16,17,19] covering the sleep period may be related to stage-related alterations in vagal tone. In the present study, all participants were awake and working in daytime and nighttime; thus, the observed decreases in HRV indices may directly result from pollution-related changes during the study.

An important finding of the present study is the observation that effects of indoor air pollutants on HRV indices were stronger when participants worked during nighttime compared with daytime periods of work, despite the fact that job assignments were similar during these two shifts. Shiftwork has direct effects on cardiac autonomic activity [21] and is associated with increased risk of coronary heart disease [22]. Some studies have reported that important cardiovascular risk factors, including hypertension,

low- high density lipoprotein cholesterol and high triglyceride levels are higher for shift workers than for daytime workers [23,24]. Among a panel of 22 blue-collar workers in a steel company, HRV indices were lower when workers worked at night compared with morning and evening periods of work [25]. Accordingly, nighttime work may potentially increase the vulnerability to the occurrence of cardiovascular diseases and susceptibility to air pollution. These findings may explain stronger effects of indoor air pollutants on HRV indices among participants working at nighttime than at daytime. However, we may not completely avoid healthy worker effect even though we used selection criteria to recruit similar participants for daytime and nighttime groups in this study. Such effect may have resulted in the lack of significant differences in the effects of indoor air pollution on HRV indices.

Another interesting finding in our study is that participants with coffee consumption had lower pollution-effects on decreased HRV indices compared to participants without coffee consumption during the study. Caffeine ingestion in a beverage has been demonstrated to enhance modulation of parasympathetic nerve activity in humans [26]. A recent study indicated that espresso coffee consumption influences parasympathetic activity and then increases HRV indices in 20 young, healthy sedentary subjects. Furthermore, this study showed that a cup of espresso coffee didn't modify blood pressure, suggesting that coffee consumption didn't induce hypertensive effects [15]. In the present study, we have observed that participants with coffee consumption had significantly higher values of SDNN (mean ± standard deviation of daytime and nighttime = 1.77 ± 0.35 and 2.01 ± 0.45 ms<sup>2</sup>) and r-MSSD (daytime = 1.32 ± 0.27 ms<sup>2</sup>; nighttime = 1.62 ± 0.40 ms<sup>2</sup>) than the participants without coffee consumption (daytime and nighttime SDNN = 1.59 ± 0.25 and 1.74 ± 0.29 ms<sup>2</sup>; daytime and nighttime r-MSSD = 1.11 ± 0.18 and 1.46 ± 0.30 ms<sup>2</sup>). Although direct evidence is needed to demonstrate that coffee consumption can modify indoor air pollution effects on autonomic function in young healthy subjects, the present study is the first experiment suggests some caution in the use of coffee for young healthy workers with pollution-induced decreases in HRV indices. Further intervention studies are needed to explore whether coffee

consumption can lower effects of indoor air pollution on alteration of cardiac rhythm.

The activation of the autonomic nervous system by noise has been reported to play an important role in producing disturbances of physiological functions of the cardiovascular system [27]. In the present study, no significant association was observed between noise and any of HRV indices in our models. Such result was expected, as environmental status had no significant effects on noise levels in daytime (8-hr time-weighted average level = 51 dBA) and nighttime (46 dBA). Therefore, the observed declines in HRV may result from pollution-related changes during the study.

## Conclusions

The present study demonstrated decreases in 5-min SDNN and 5-min r-MSSD subsequent to indoor air pollutants exposures in a panel of 60 young healthy convenient store workers. Furthermore,

we found that the decreases in HRV indices were most pronounced in nighttime workers without coffee consumption. More studies is needed to elucidate whether this is because nighttime incorporates the lag effect of ambient air pollution or coffee is a confounding factor and mask the effect of indoor air pollution on HRV indices in young healthy workers. Finally, our study further supports the cardiotoxicity of indoor particulate exposure. Future study is needed to investigate which of the particulate constituents is responsible for decreases in nighttime HRV.

## Author Contributions

Conceived and designed the experiments: KJC LYL. Performed the experiments: LYL HCC. Analyzed the data: KJC HCC. Contributed reagents/materials/analysis tools: LYL HCC. Wrote the paper: KJC.

## References

- Lin LY, Lin CY, Lin YC, Chuang KJ (2009) The effects of indoor particles on blood pressure and heart rate among young adults in Taipei, Taiwan. *Indoor Air* 19: 482–488.
- McCracken J, Smith KR, Stone P, Diaz A, Arana B, et al. (2011) Intervention to lower household wood smoke exposure in Guatemala reduces ST-segment depression on electrocardiograms. *Environ Health Perspect* 119: 1562–1568.
- Brook RD, Rajagopalan S, American Heart Association Council on Epidemiology and Prevention, Council on the Kidney in Cardiovascular Disease, and Council on Nutrition, Physical Activity and Metabolism, et al. (2010) Particulate matter air pollution and cardiovascular disease: An update to the scientific statement from the American Heart Association. *Circulation* 121: 2331–2378.
- Schroeder EB, Liao D, Chambless LE, Prineas RJ, Evans GW, et al. (2003) Hypertension, blood pressure, and heart rate variability: the Atherosclerosis Risk in Communities (ARIC) study. *Hypertension* 42: 1106–1111.
- Huikuri HV, Jokinen V, Sävänne M, Nieminen MS, Airaksinen KE, et al. (1999) Heart rate variability and progression of coronary atherosclerosis. *Arterioscler Thromb Vasc Biol* 19: 1979–1985.
- La Rovere MT, Pinna GD, Maestri R, Mortara A, Capomolla S, et al. (2003) Short-term heart rate variability strongly predicts sudden cardiac death in chronic heart failure patients. *Circulation* 107: 565–570.
- Chuang KJ, Chan CC, Chen NT, Su TC, Lin LY (2005) Effects of particle size fractions on reducing heart rate variability in cardiac and hypertensive patients. *Environ Health Perspect* 113: 1693–1697.
- Ren C, O'Neill MS, Park SK, Sparrow D, Vokonas P, et al. (2011) Ambient temperature, air pollution, and heart rate variability in an aging population. *Am J Epidemiol* 173: 1013–1021.
- Chuang KJ, Chan CC, Su TC, Lee CT, Tang CS (2007) The effect of urban air pollution on inflammation, oxidative stress, coagulation, and autonomic dysfunction in young adults. *Am J Respir Crit Care Med* 176: 370–376.
- Pope CA 3rd, Dockery DW (2006) Health effects of fine particulate air pollution: lines that connect. *J Air Waste Manag Assoc* 56: 709–742.
- McCusker RR, Goldberger BA, Cone EJ (2003) Caffeine content of specialty coffees. *J Anal Toxicol* 2: 520–522.
- Hibino G, Moritani T, Kawada T, Fushiki T (1997) Caffeine enhances modulation of parasympathetic nerve activity in humans: quantification using power spectral analysis. *J Nutr* 127: 1422–1427.
- Cornelis MC, El-Sohehy A (2007) Coffee, caffeine, and coronary heart disease. *Curr Opin Clin Nutr Metab Care* 10: 745–751.
- Nurminen ML, Niittynen L, Korpela R, Vapaatalo H (1999) Coffee, caffeine and blood pressure: a critical review. *Eur J Clin Nutr* 55: 831–839.
- Monda M, Viggiano A, Vicidomini C, Viggiano A, Iannaccone T, et al. (2009) Espresso coffee increases parasympathetic activity in young, healthy people. *Nutr Neurosci* 12: 43–48.
- Riediker M, Cascio WE, Griggs TR, Herbst MC, Bromberg PA, et al. (2004) Particulate matter exposure in cars is associated with cardiovascular effects in healthy young men. *Am J Respir Crit Care Med* 169: 934–940.
- Cavallari JM, Eisen EA, Chen JC, Fang SC, Dobson CB, et al. (2007) Night heart rate variability and particulate exposures among boilermaker construction workers. *Environ Health Perspect* 115: 1046–1051.
- Pieters N, Plusquin M, Cox B, Kicinski M, Vangronsveld J, et al. (2012) An epidemiological appraisal of the association between heart rate variability and particulate air pollution: a meta-analysis. *Heart* 98: 1127–1135.
- Pope CA 3rd, Verrier RL, Lovett EG, Larson AC, Raizenne ME, et al. (1999) Heart rate variability associated with particulate air pollution. *Am Heart J* 138: 890–899.
- Burr RL (2007) Interpretation of normalized spectral heart rate variability indices in sleep research: a critical review. *Sleep* 30: 913–919.
- Holmes AL, Burgess HJ, McCulloch K, Lamond N, Fletcher A, et al. (2001) Daytime cardiac autonomic activity during one week of continuous night shift. *J Hum Ergol (Tokyo)* 30: 223–228.
- Virkkunen H, Härmä M, Kauppinen T, Tenkanen L (2006) The triad of shift work, occupational noise, and physical workload and risk of coronary heart disease. *Occup Environ Med* 63: 378–386.
- Peter R, Alfredsson L, Siegrist J, Westerholm P (1999) Does a stressful psychosocial environment mediate the effects of shift work on cardiovascular risk factors? *Scand J Work Environ Health* 25: 376–381.
- Karlsson BH, Knutsson AK, Lindahl BO, Alfredsson LS (2003) Metabolic disturbance in male workers with rotating three-shift work. Results of the WOLF study. *Int Arch Occup Environ Health* 76: 424–430.
- Furlan R, Barbic F, Piazza S, Tinelli M, Seghizzi P, et al. (2000) Modifications of cardiac autonomic profile associated with a shift schedule of work. *Circulation* 102: 1912–1916.
- Hibino G, Moritani T, Kawada T, Fushiki T (1997) Caffeine enhances modulation of parasympathetic nerve activity in humans: quantification using power spectral analysis. *J Nutr* 127: 1422–1427.
- Carter N, Henderson R, Lal S, Hart M, Booth S, et al. (2002) Cardiovascular and autonomic response to environmental noise during sleep in night shift workers. *Sleep* 25: 457–464.
